# Supplementary material for: A highly diastereoselective three-component tandem 1,4-conjugated addition–cyclization reaction to multisubstituted pyrrolidines
Source: Royal Society of Chemistry journal article supplement (doi:10.1039/c2ob06760a), 2012-01-01
Supplement: c2ob06760a.pdf [file c2ob06760a.pdf]

# **A highly diastereoselective three-component tandem 1,4-conjugated addition/cyclization reaction to multisubstituted pyrrolidines**

**Xia Zhang, Jingjing Ji, Yingguang Zhu, Changcheng Jing, Min Li and Wenhao Hu\***

**Shanghai Engineering Research Center of Molecular Therapeutics and New Drug  
Development, East China Normal University, Shanghai, 200062 China; Fax: (+86)  
021-62233176, E-mail: whu@chem.ecnu.edu.cn**

## **Supporting Information**

### **Table of Contents**

1. Crystal data
2. NMR analysis spectra for **4a-s**

## 1. Crystal data

### Crystal data of 4b

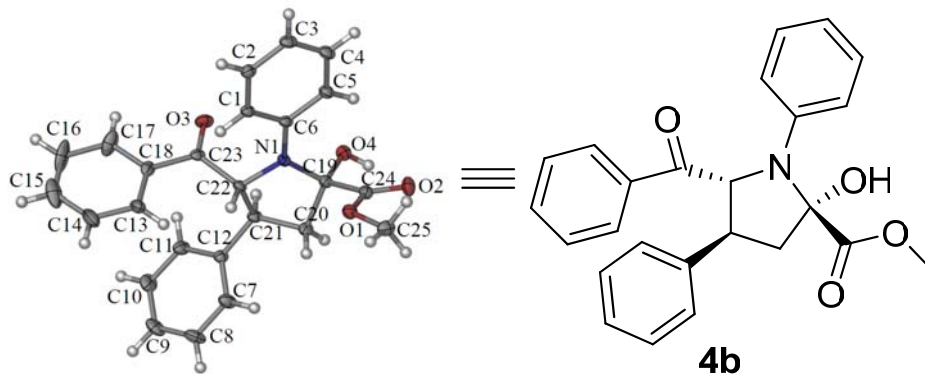

|                        |                                                 |                                                 |
|------------------------|-------------------------------------------------|-------------------------------------------------|
| Bond precision:        | C-C = 0.0044 Å                                  | Wavelength=0.71073                              |
| Cell:                  | a=11.934(2) b=14.466(3) c=12.536(2)             |                                                 |
|                        | alpha=90 beta=110.006(5) gamma=90               |                                                 |
| Temperature:           | 173 K                                           |                                                 |
|                        | Calculated                                      | Reported                                        |
| Volume                 | 2033.6(6)                                       | 2033.5(7)                                       |
| Space group            | P 21/n                                          | P2(1)/n                                         |
| Hall group             | -P 2yn                                          |                                                 |
| Moiety formula         | C <sub>25</sub> H <sub>23</sub> NO <sub>4</sub> |                                                 |
| Sum formula            | C <sub>25</sub> H <sub>23</sub> NO <sub>4</sub> | C <sub>25</sub> H <sub>23</sub> NO <sub>4</sub> |
| Mr                     | 401.44                                          | 401.44                                          |
| Dx, g cm <sup>-3</sup> | 1.311                                           | 1.311                                           |
| Z                      | 4                                               | 4                                               |
| Mu (mm <sup>-1</sup> ) | 0.089                                           | 0.089                                           |
| F000                   | 848.0                                           | 848.0                                           |
| F000'                  | 848.41                                          |                                                 |
| h,k,lmax               | 14,17,14                                        | 14,17,14                                        |
| Nref                   | 3578                                            | 3568                                            |
| Tmin,Tmax              | 0.953,0.965                                     | 0.954,0.965                                     |
| Tmin'                  | 0.953                                           |                                                 |
| Correction method=     | MULTI-SCAN                                      |                                                 |
| Data completeness=     | 0.997                                           | Theta(max)= 25.010                              |
| R(reflections)=        | 0.0605( 2707)                                   | wR2(reflections)= 0.1752( 3568)                 |
| S = 1.081              | Npar= 271                                       |                                                 |

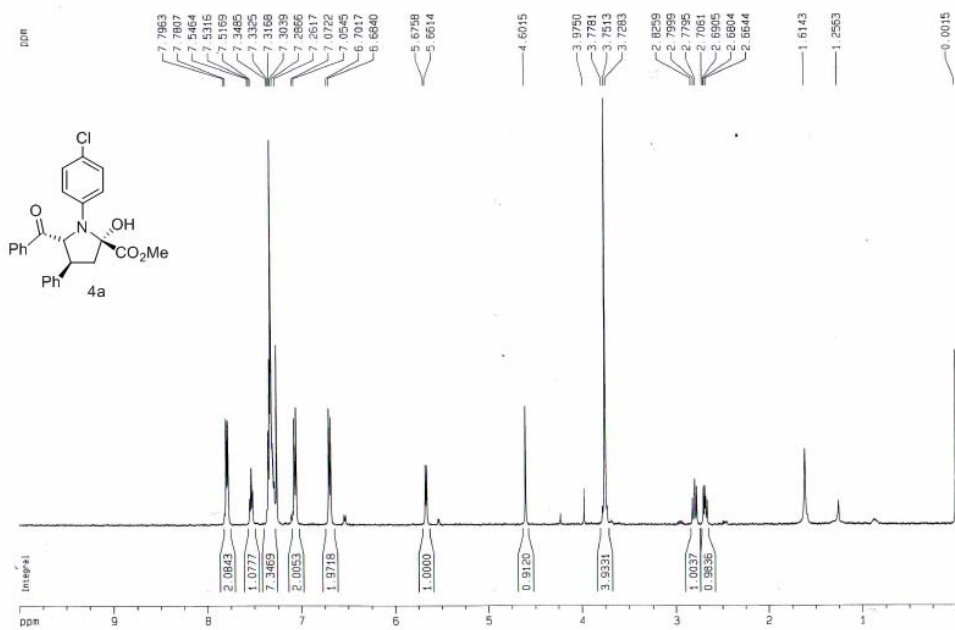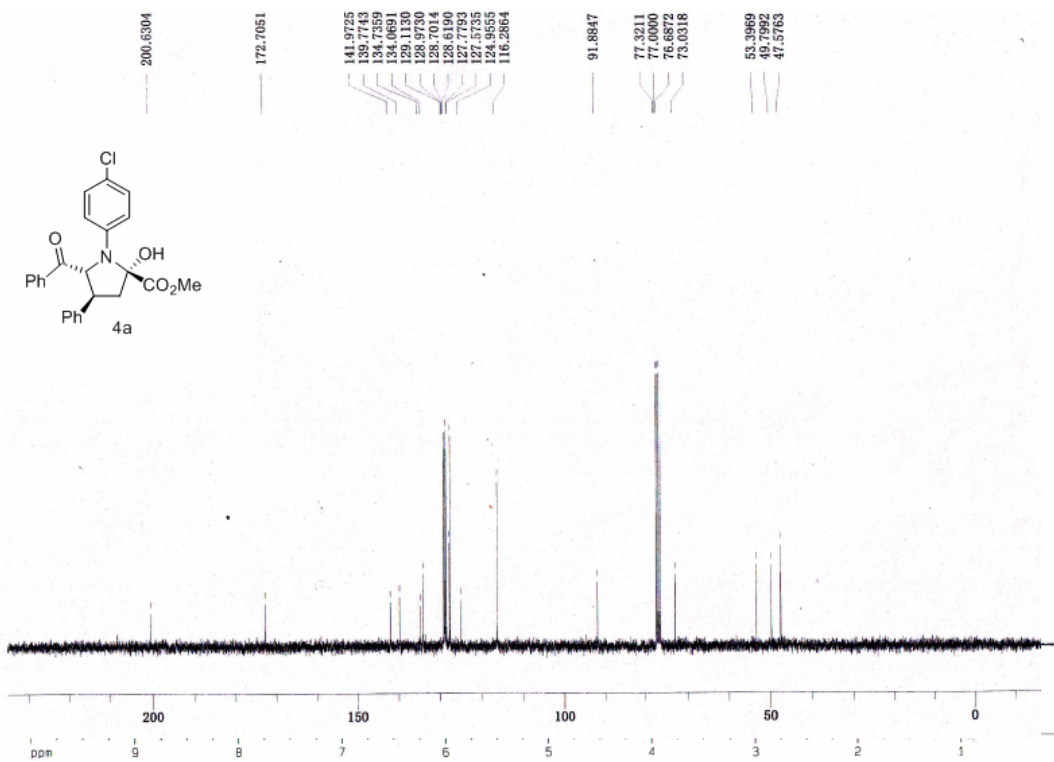

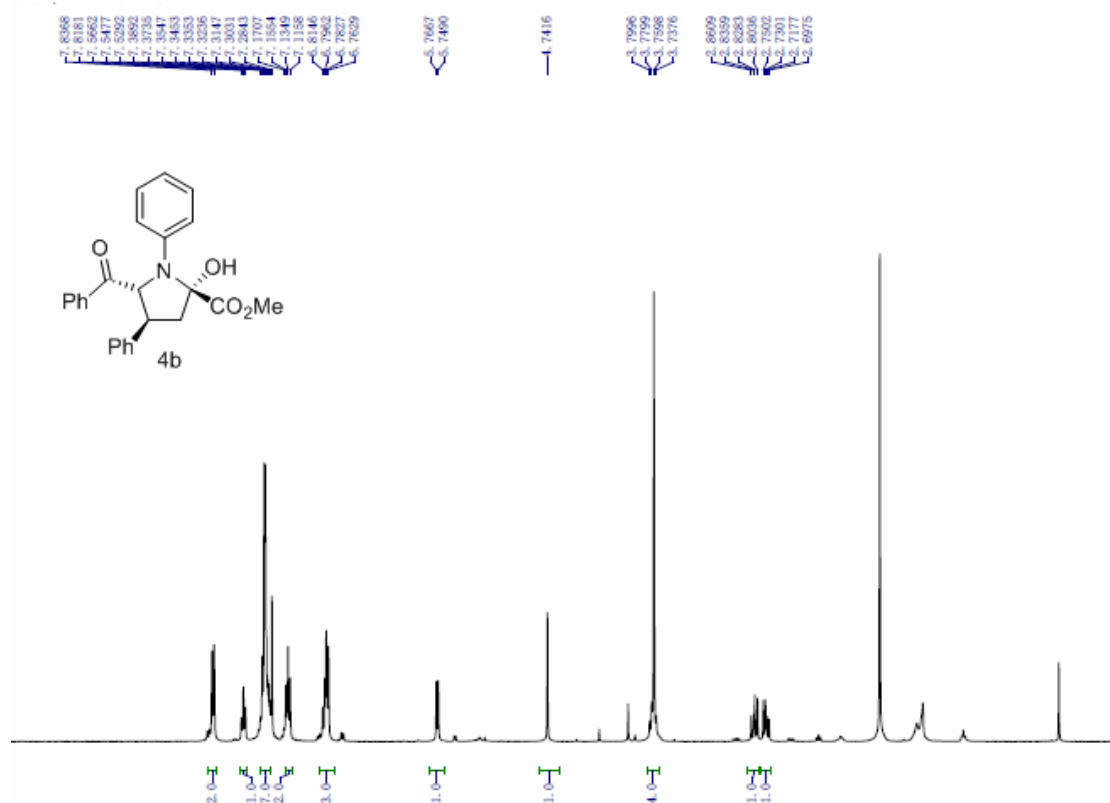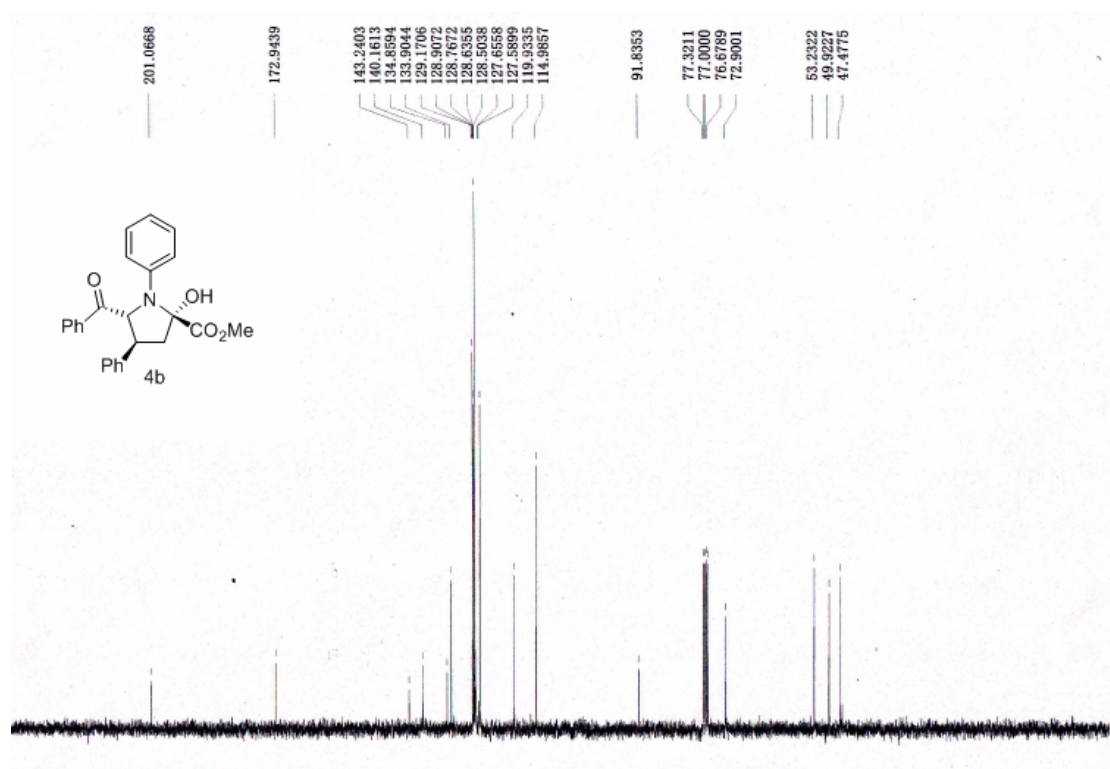

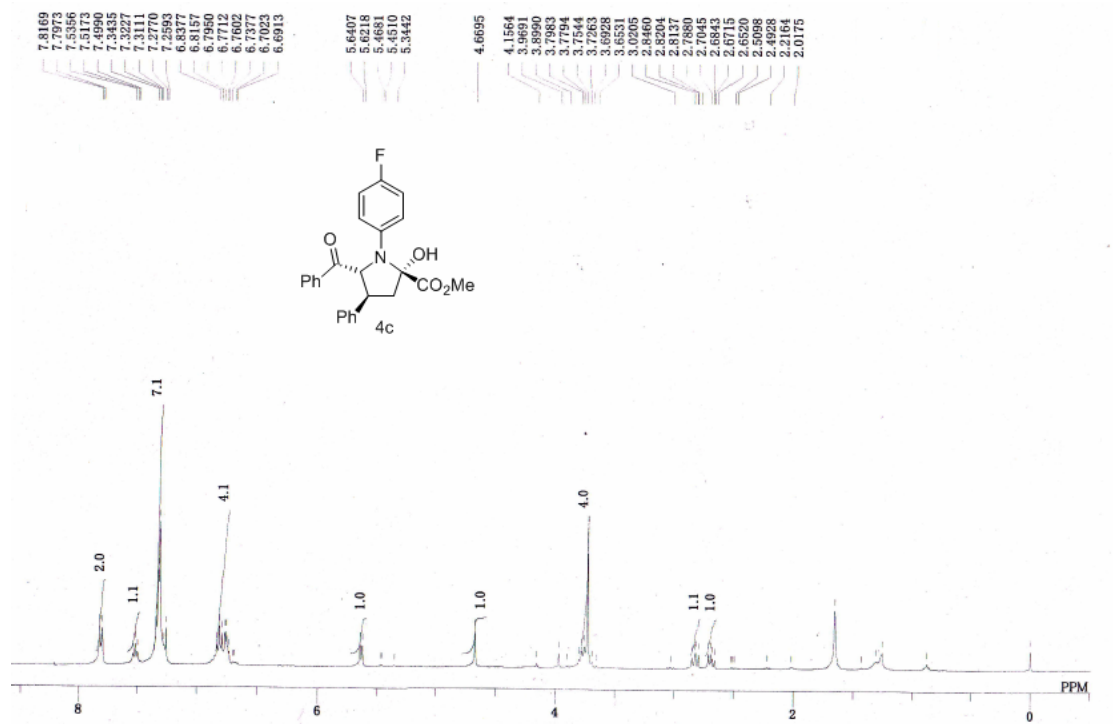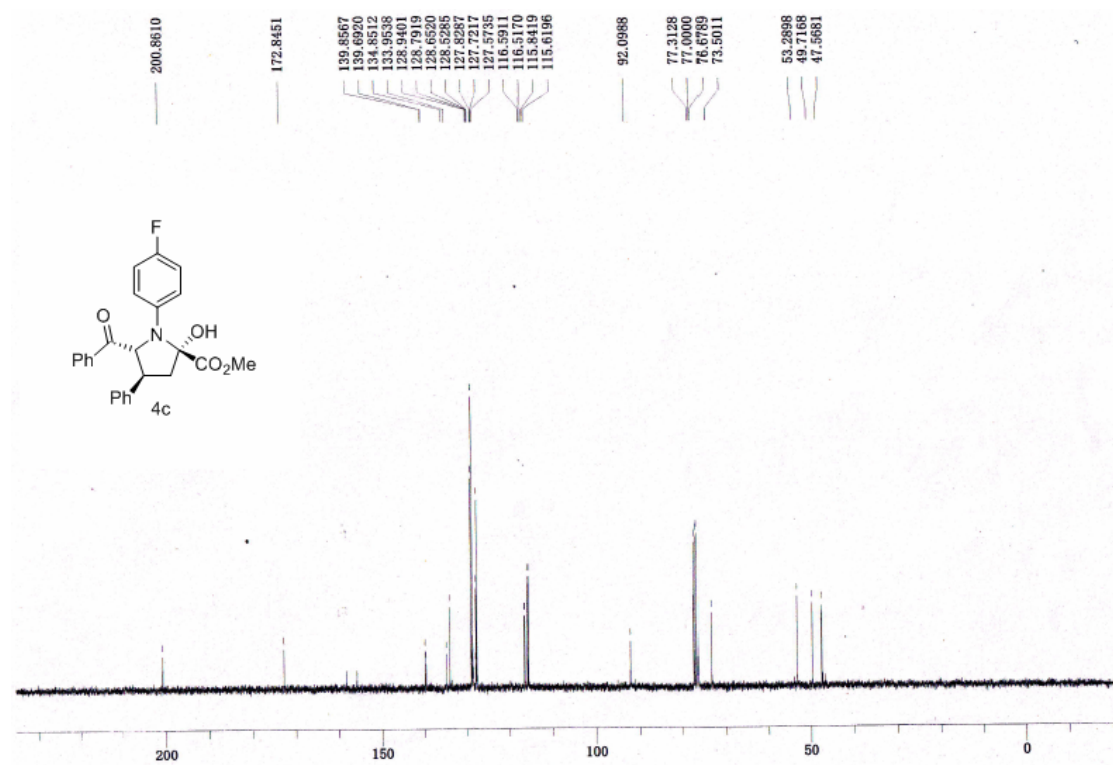

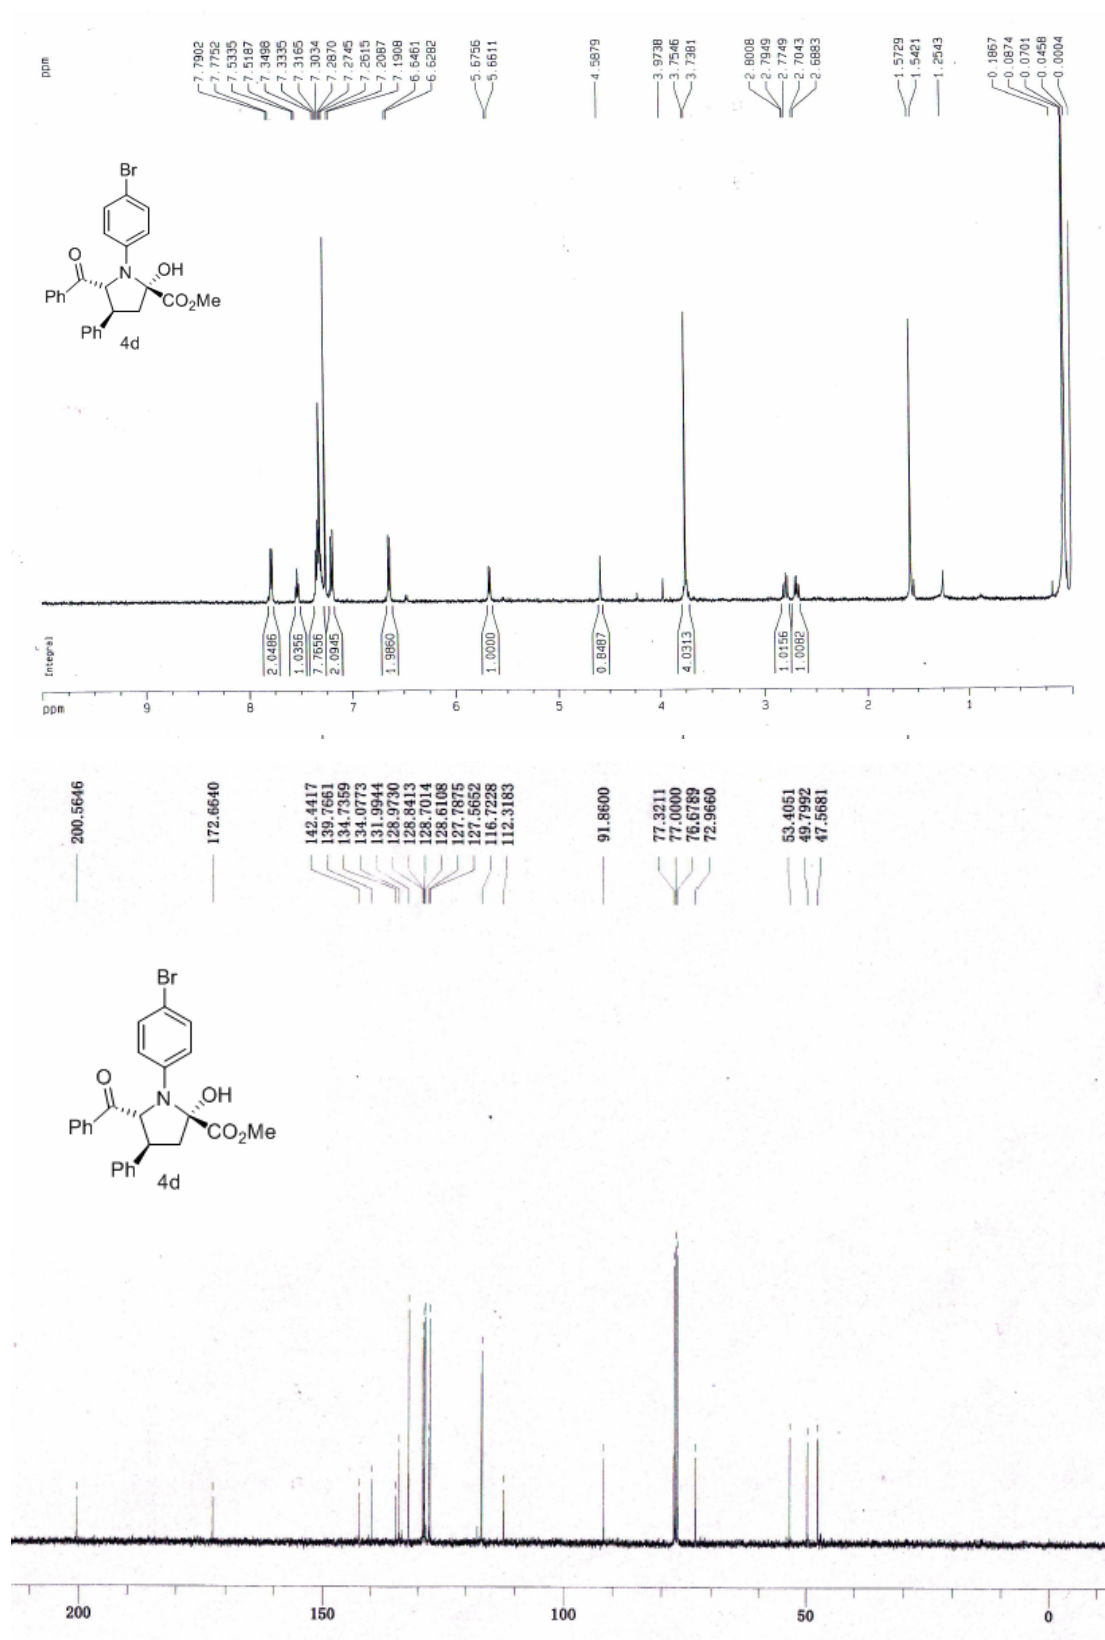

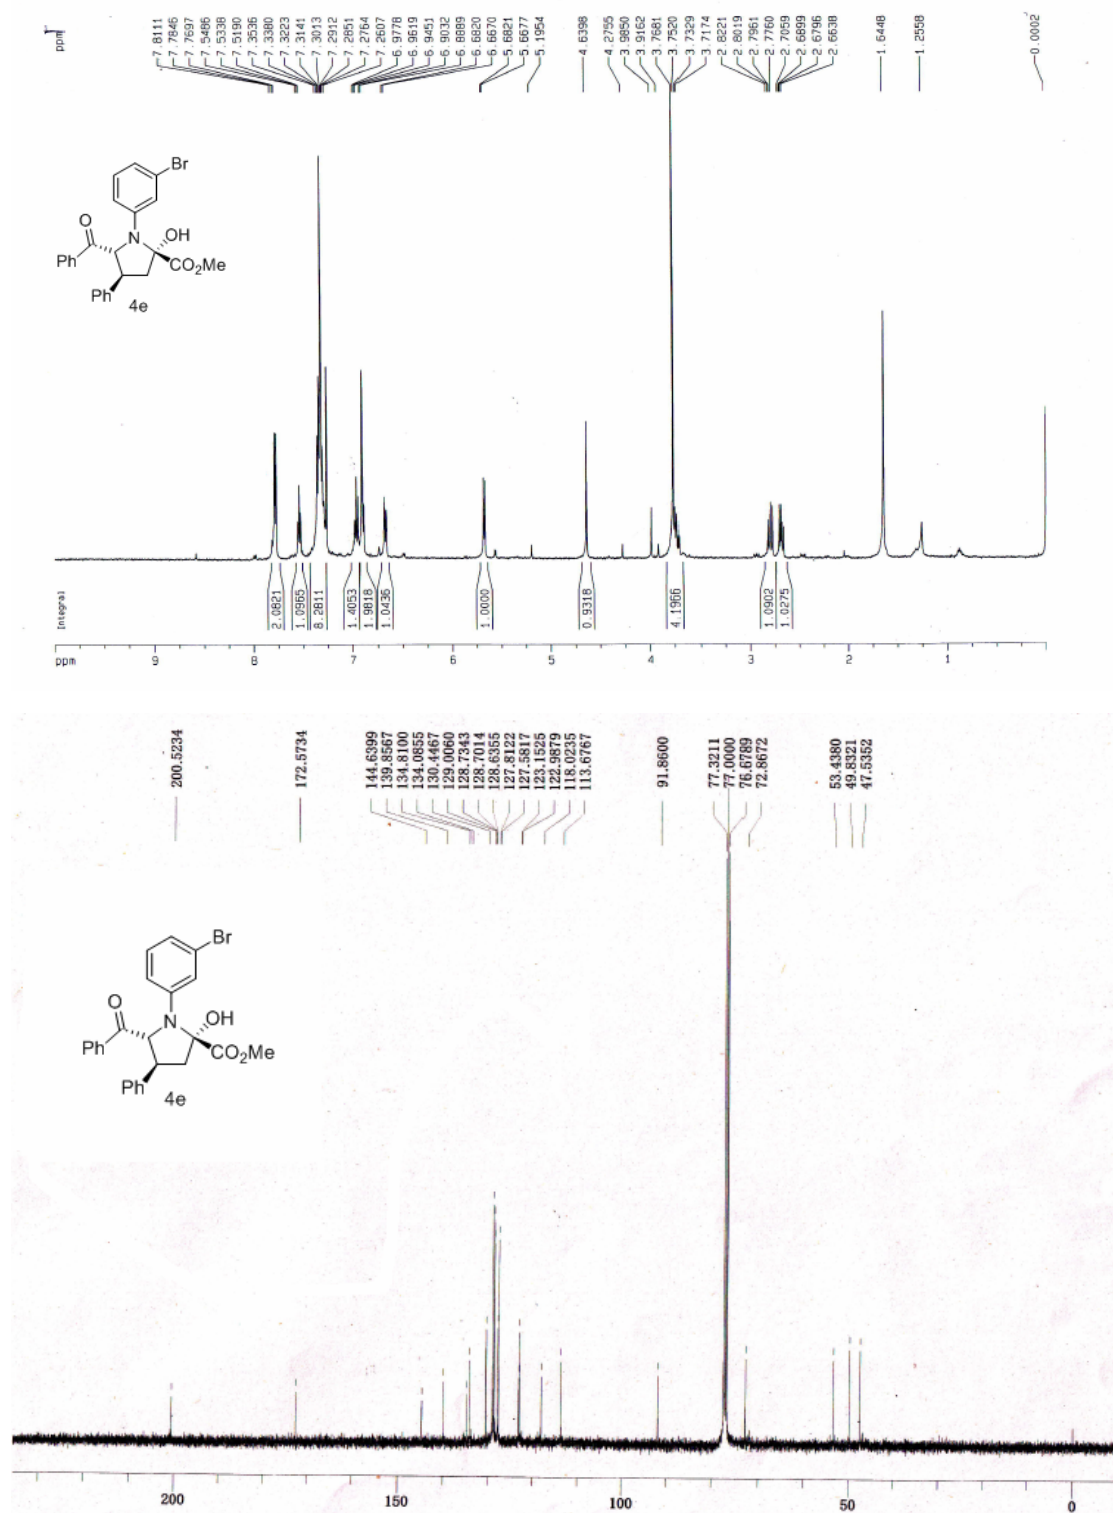

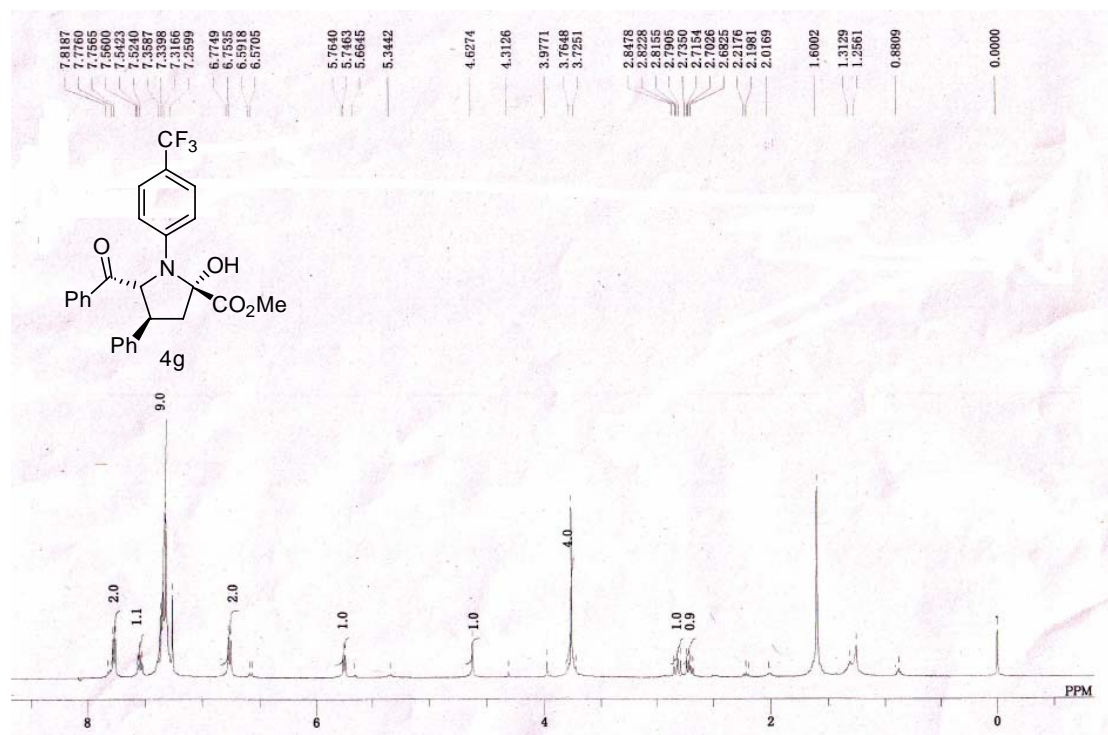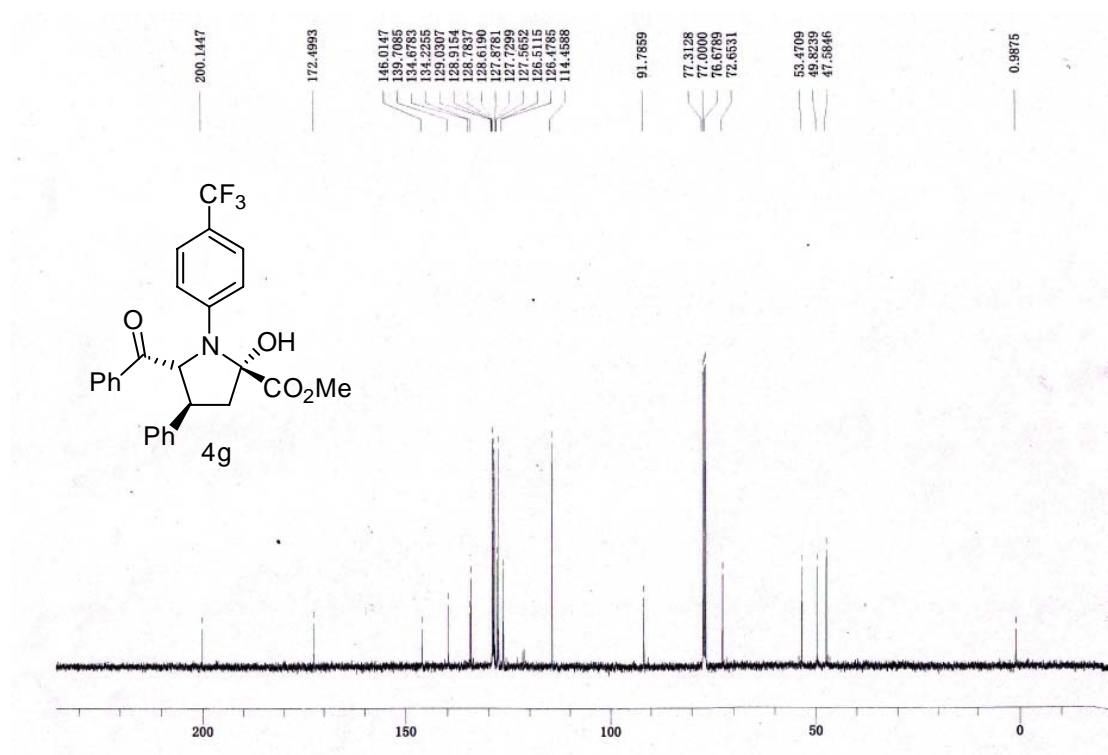



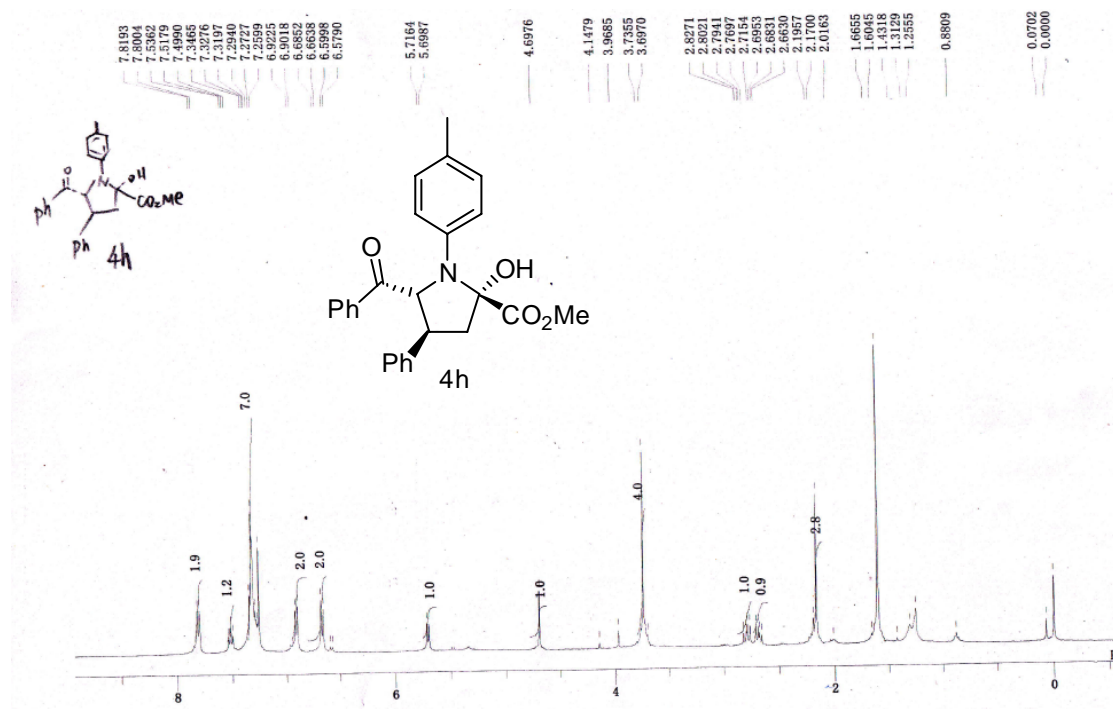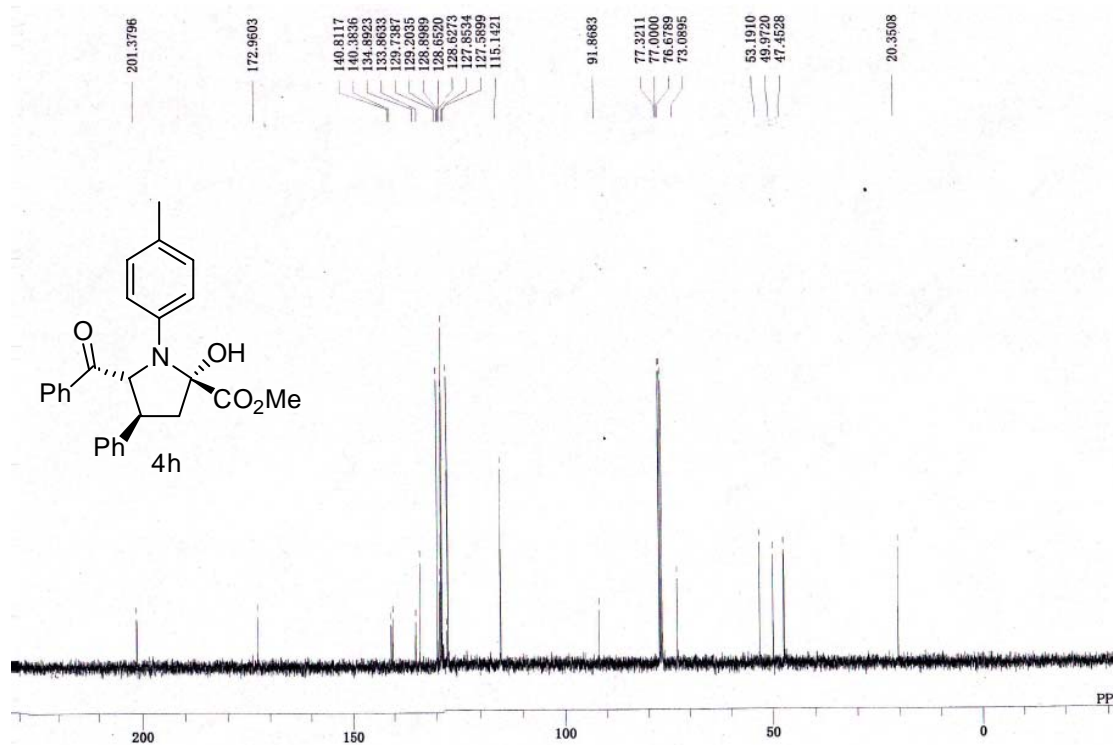

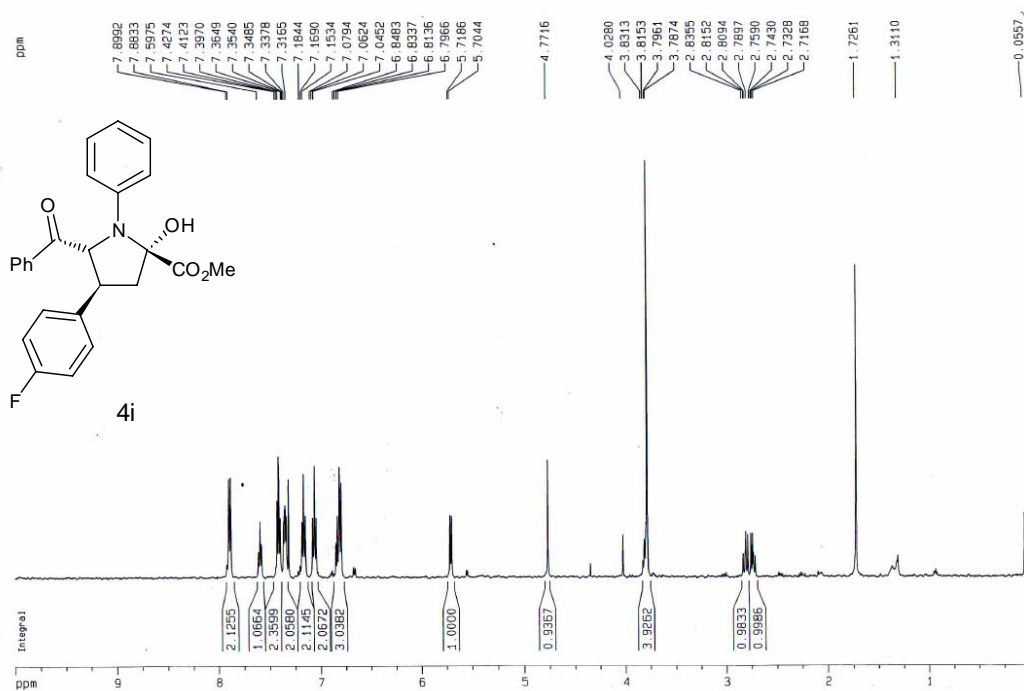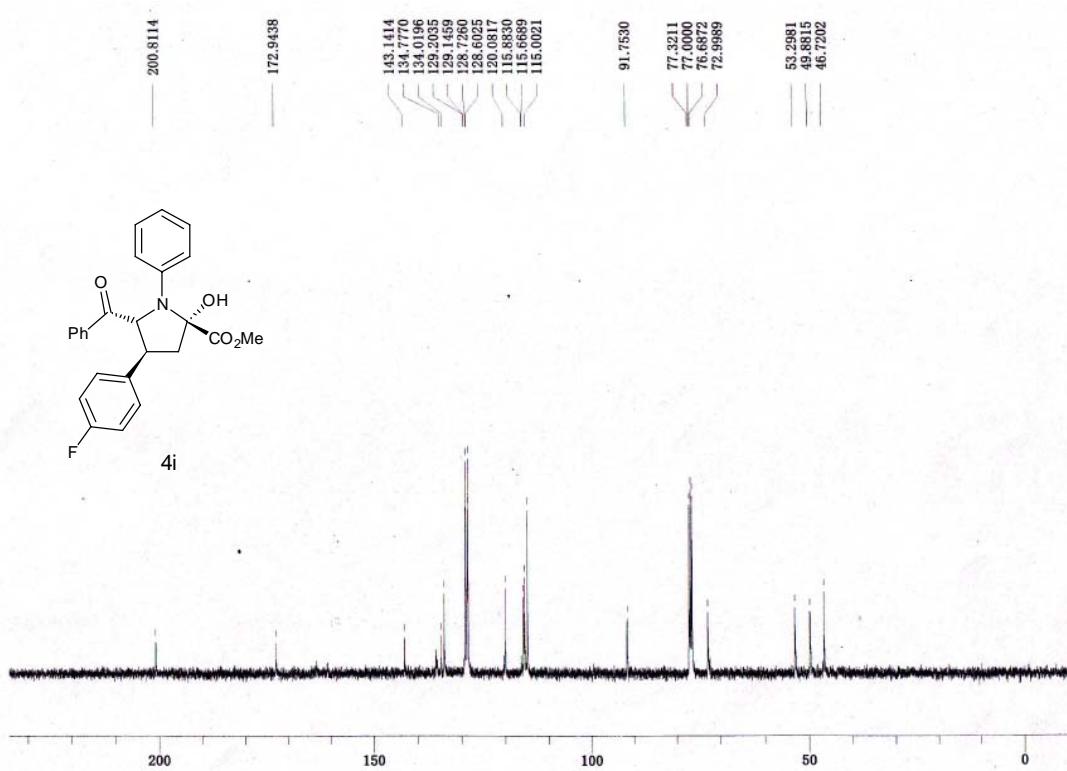

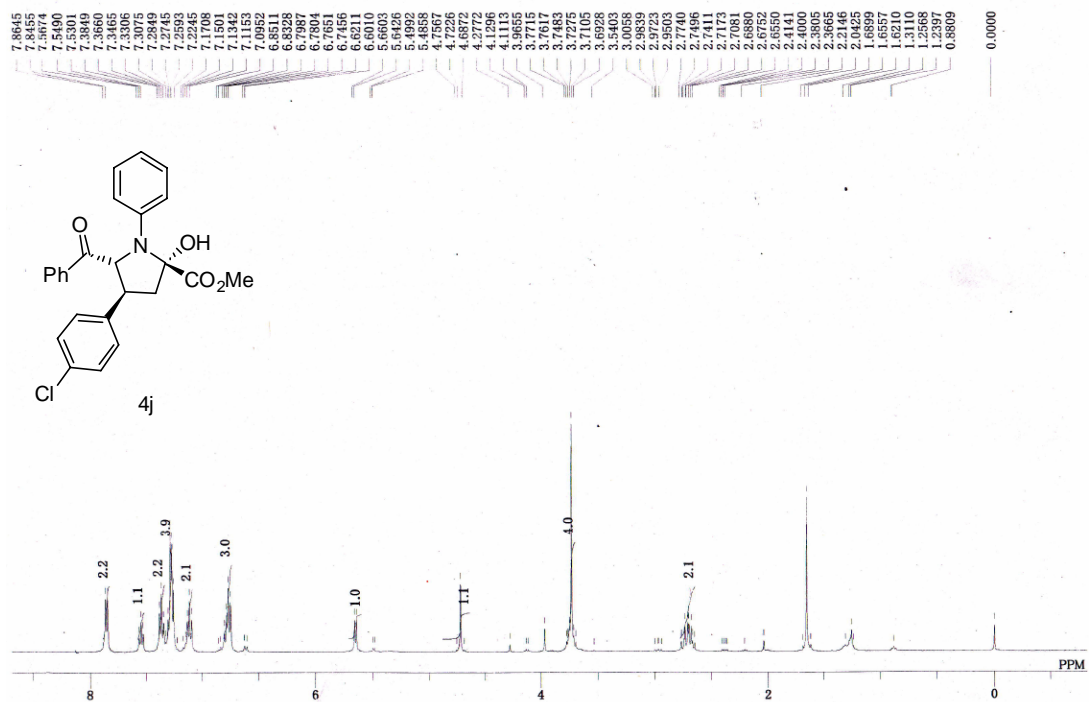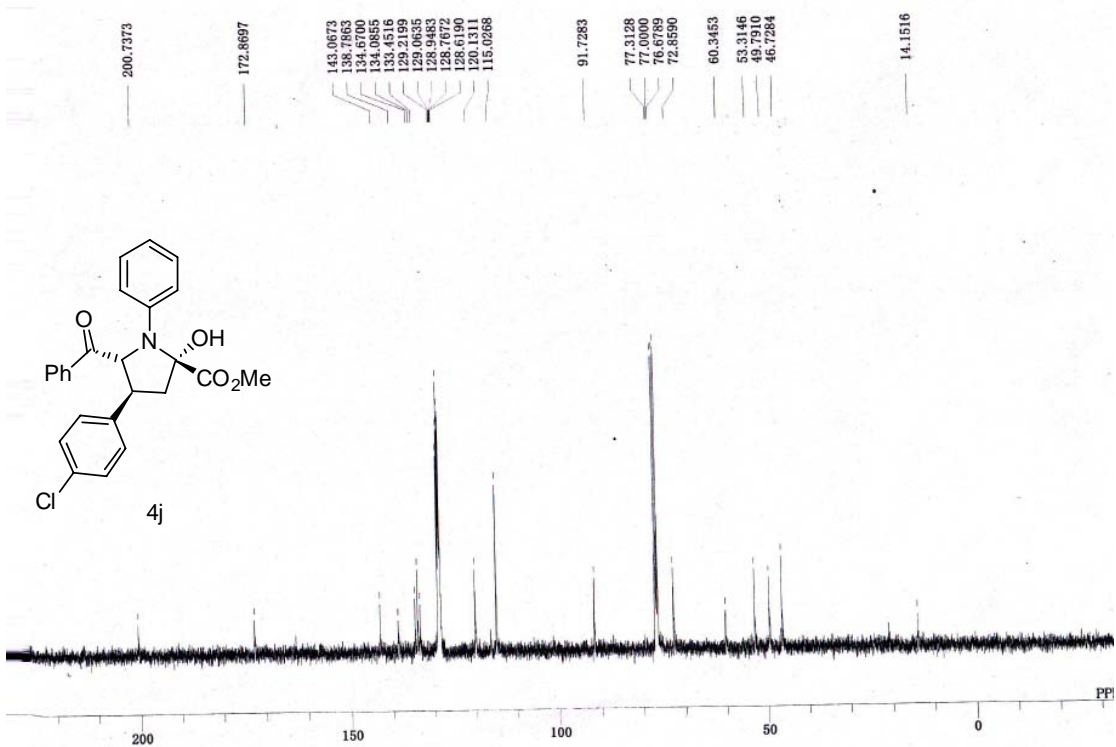

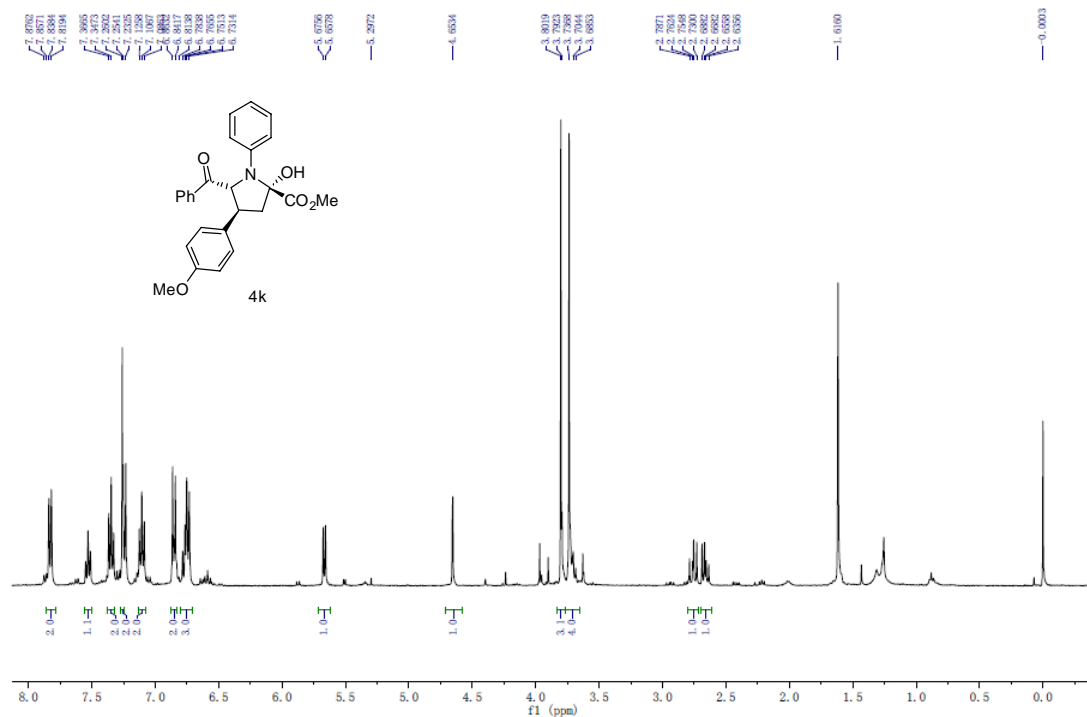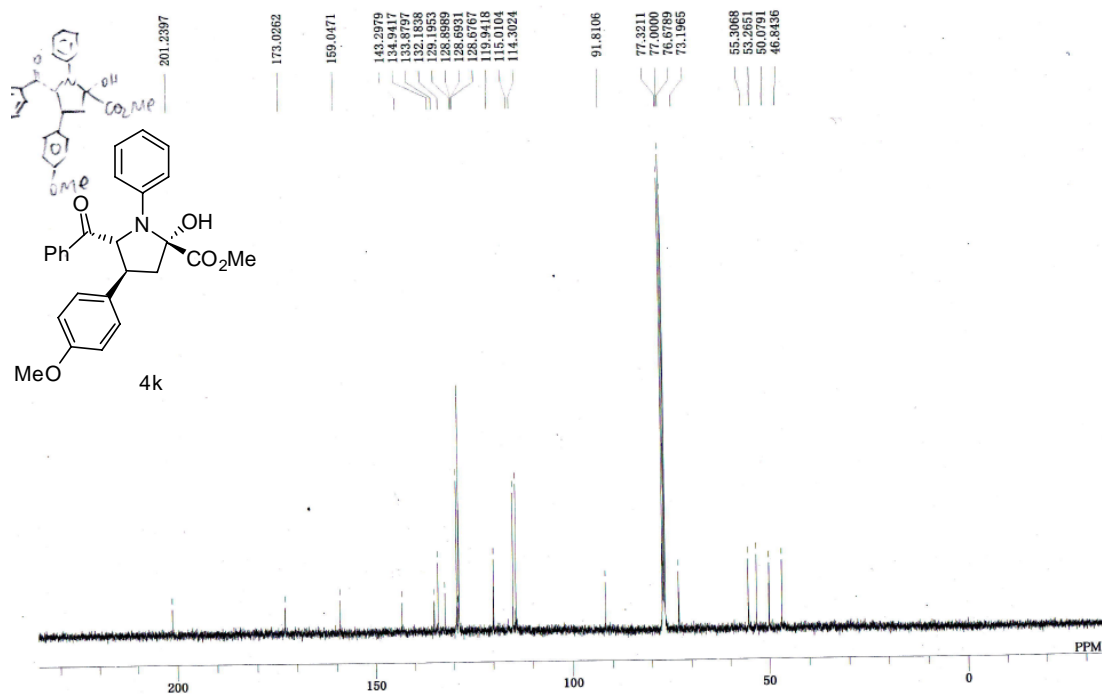

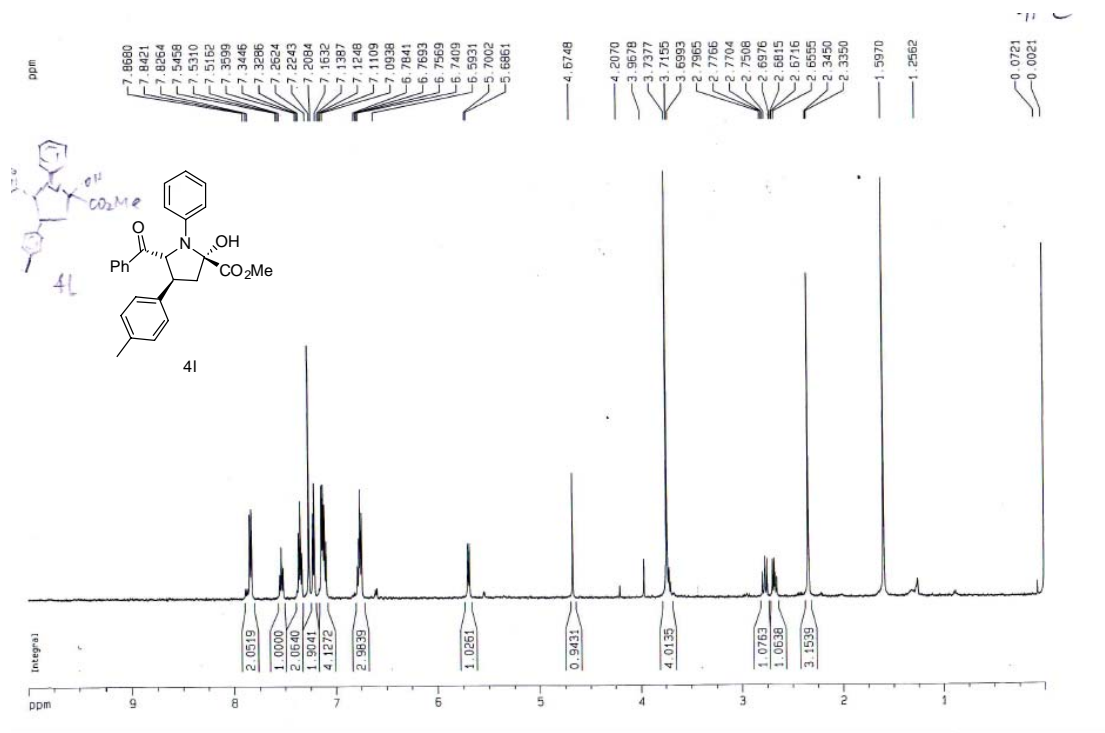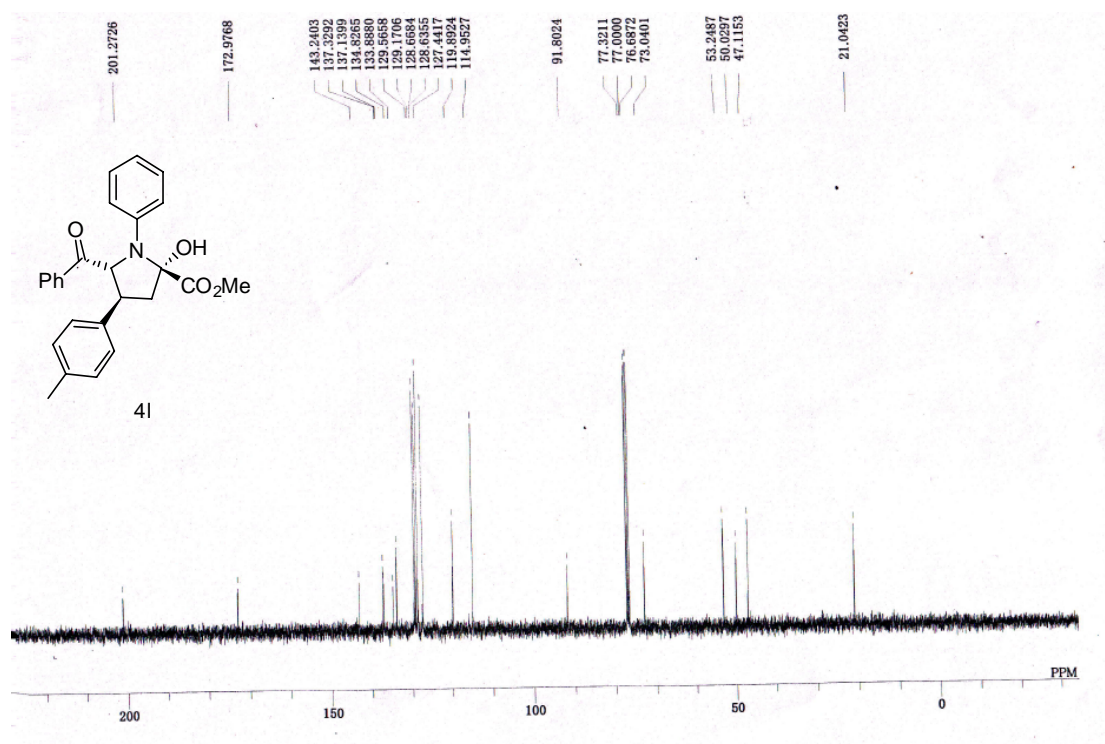

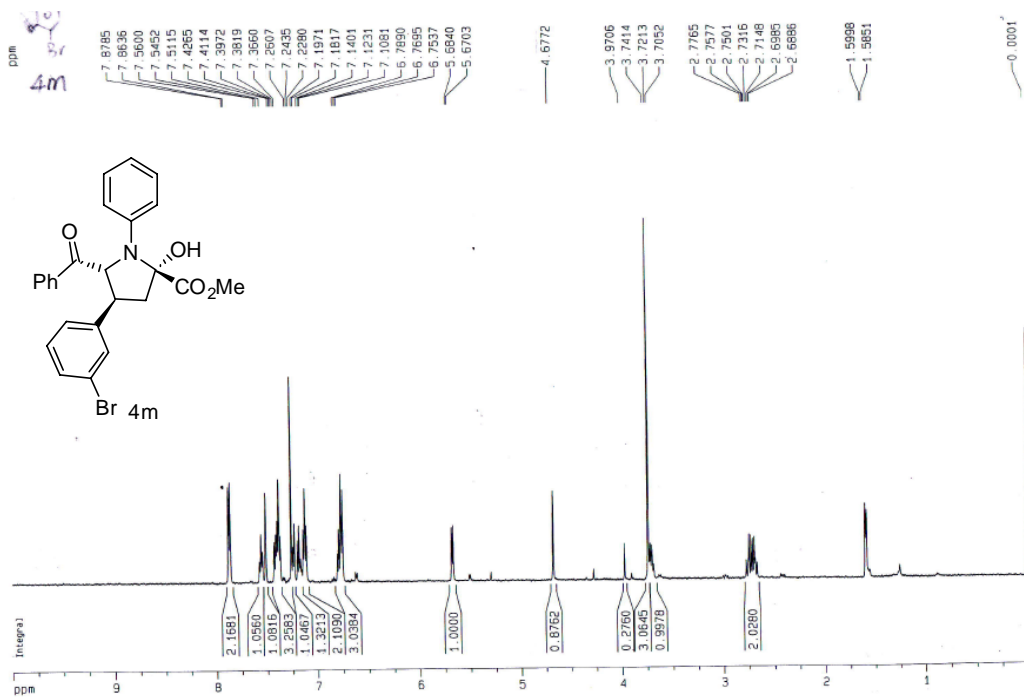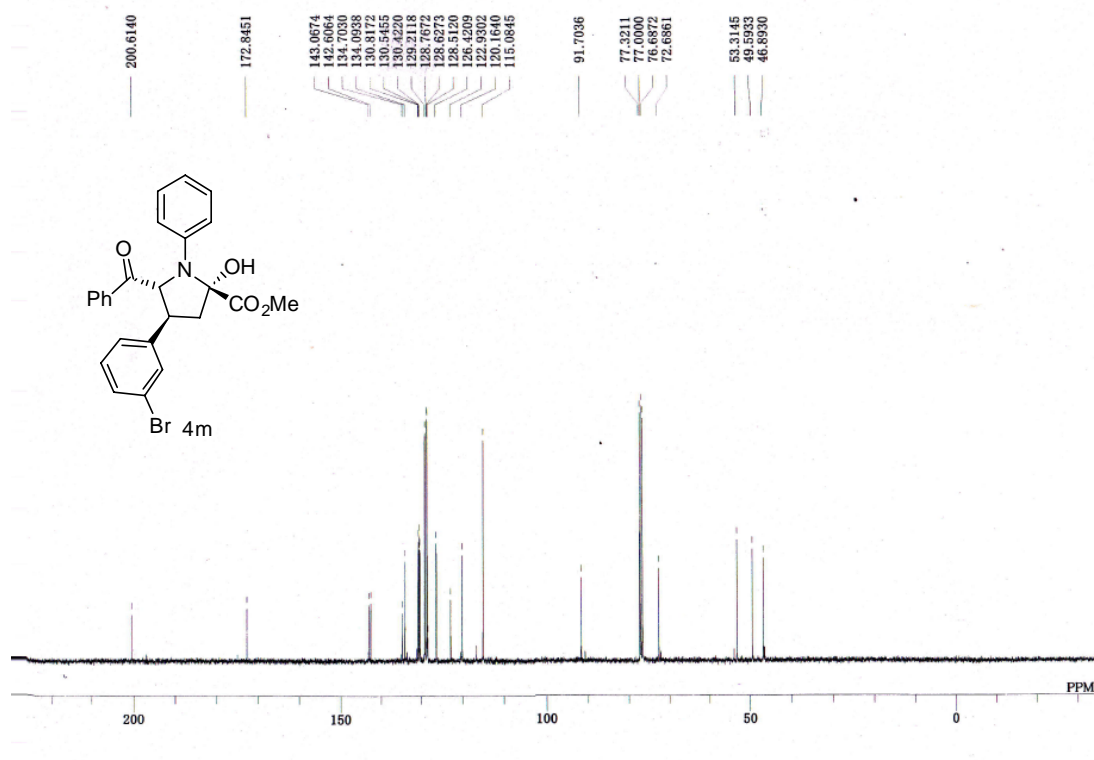

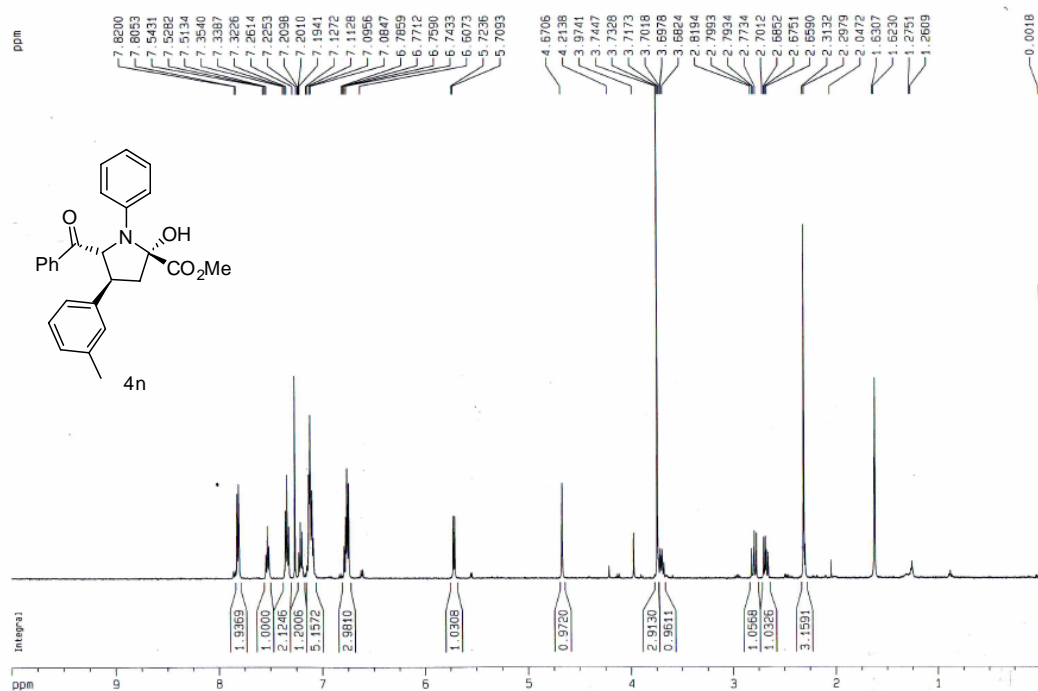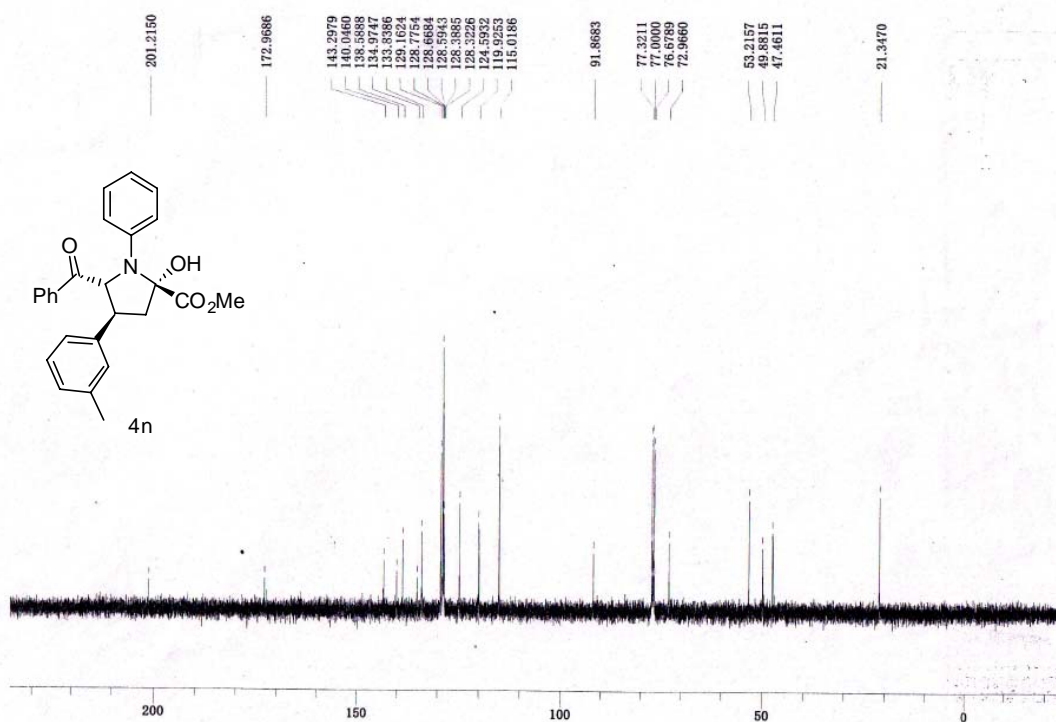

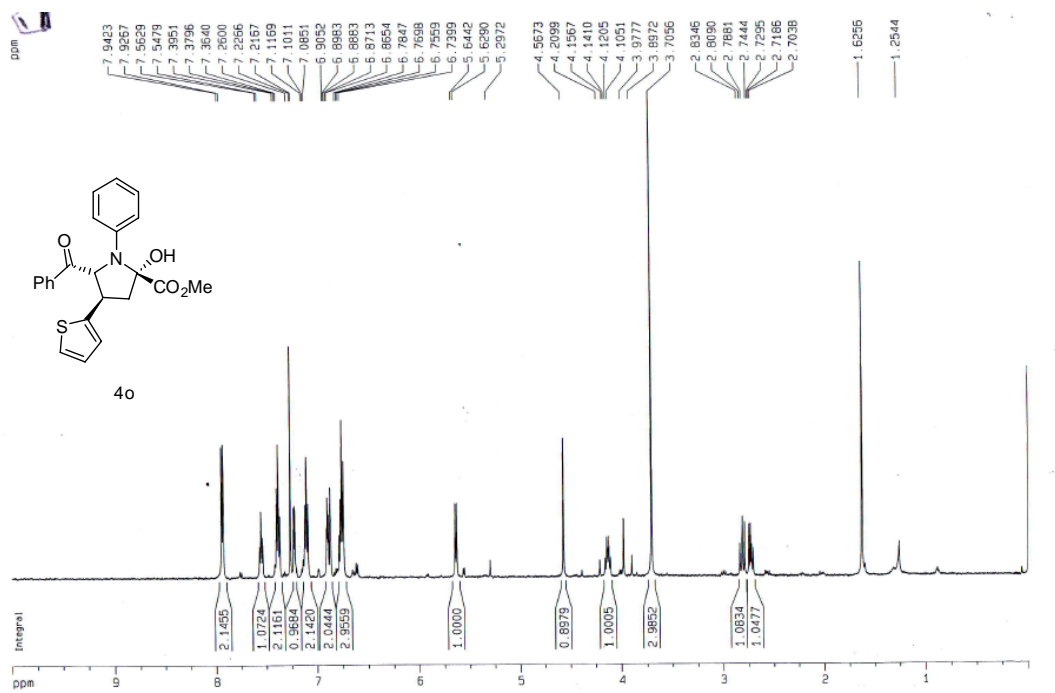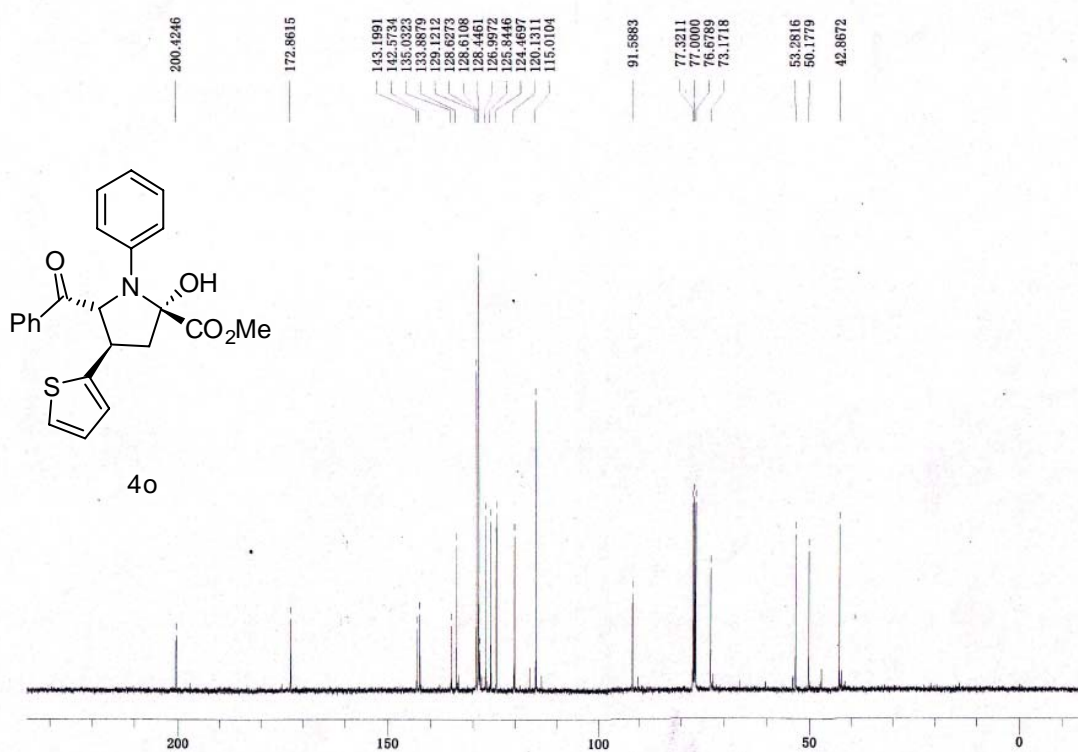



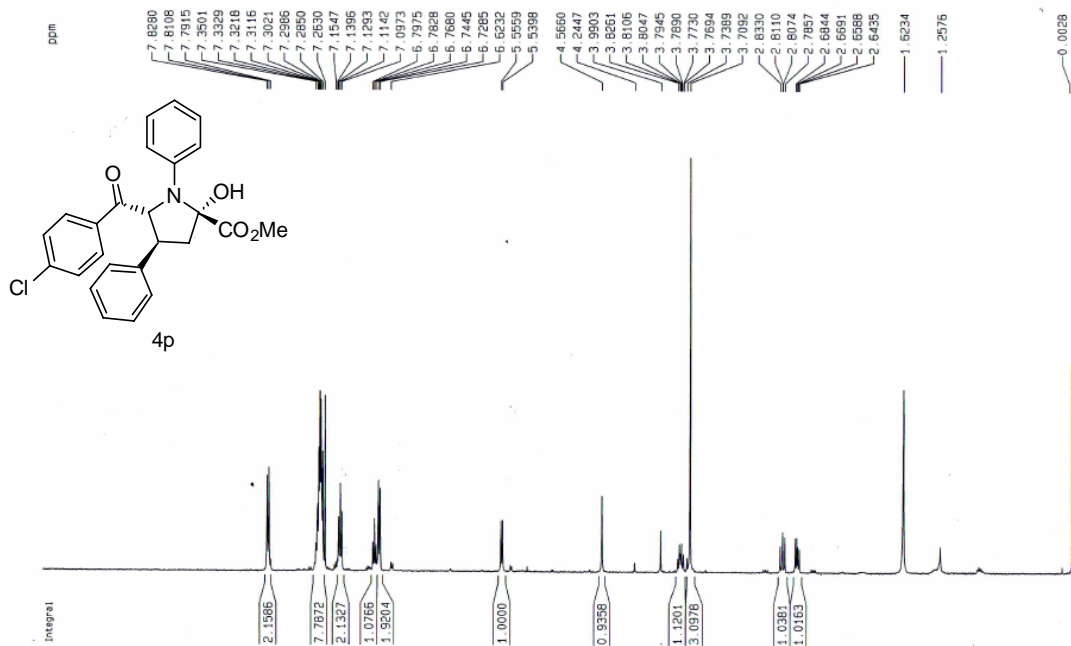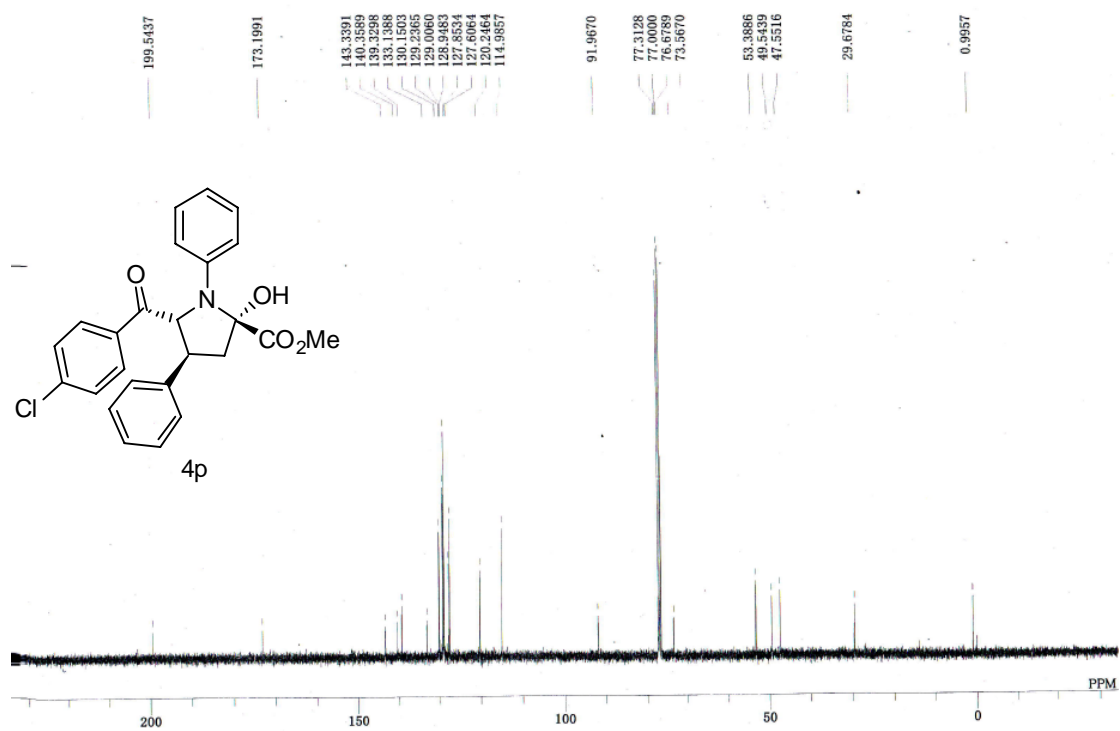

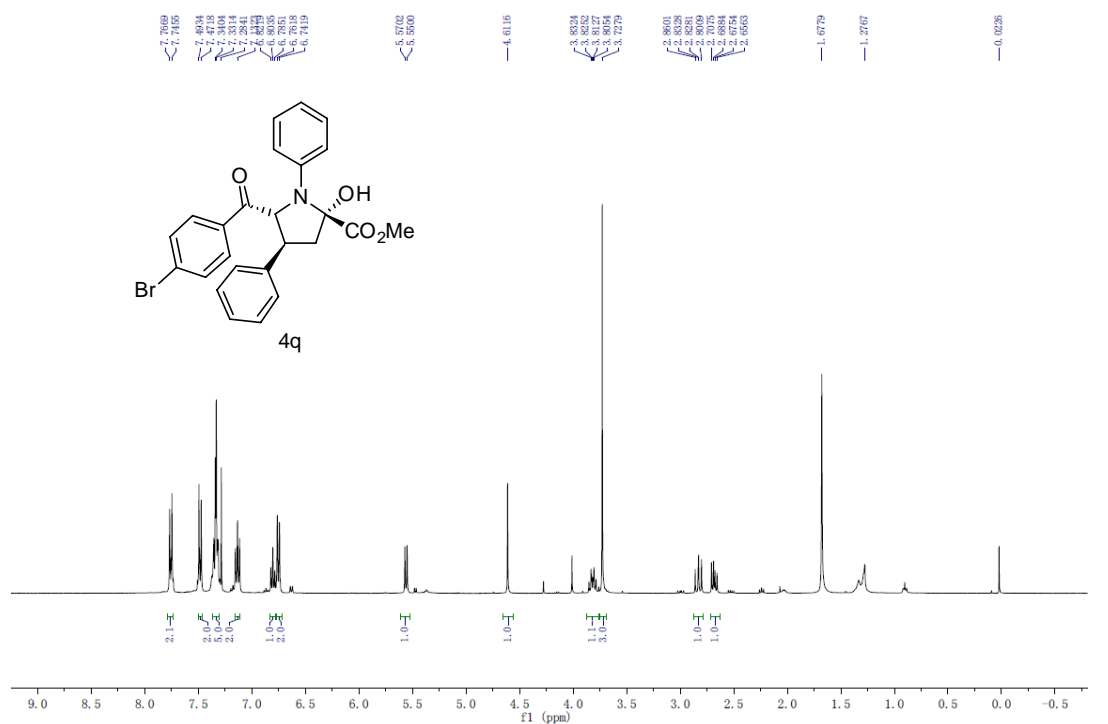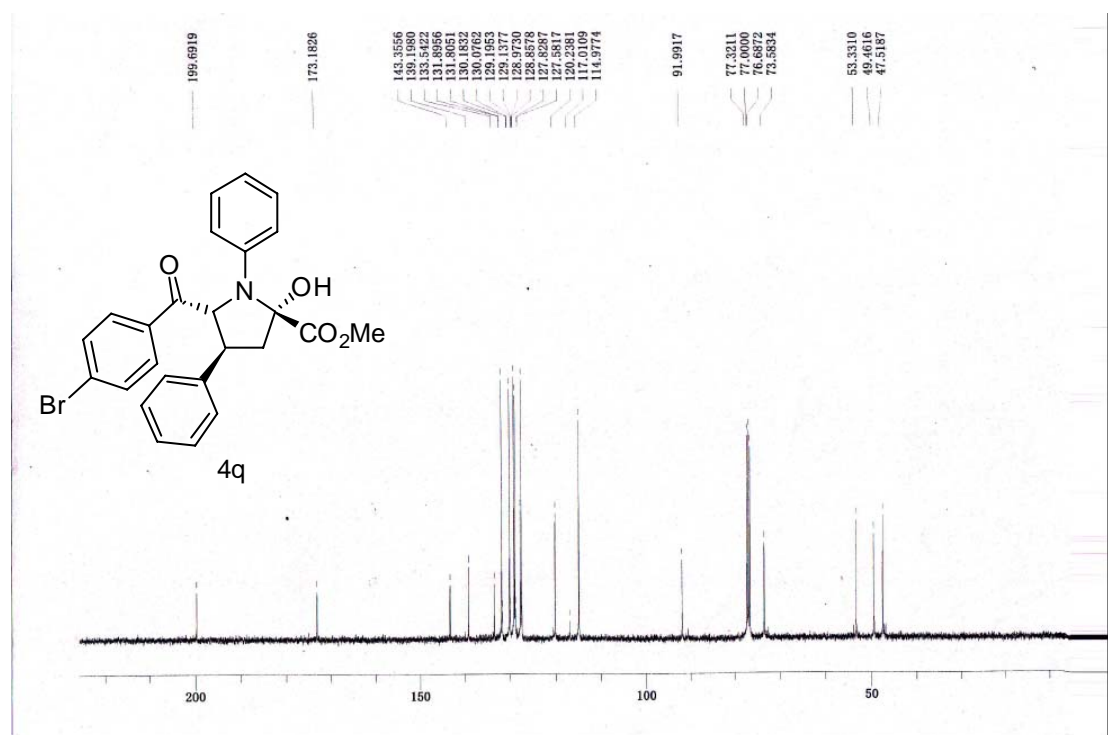

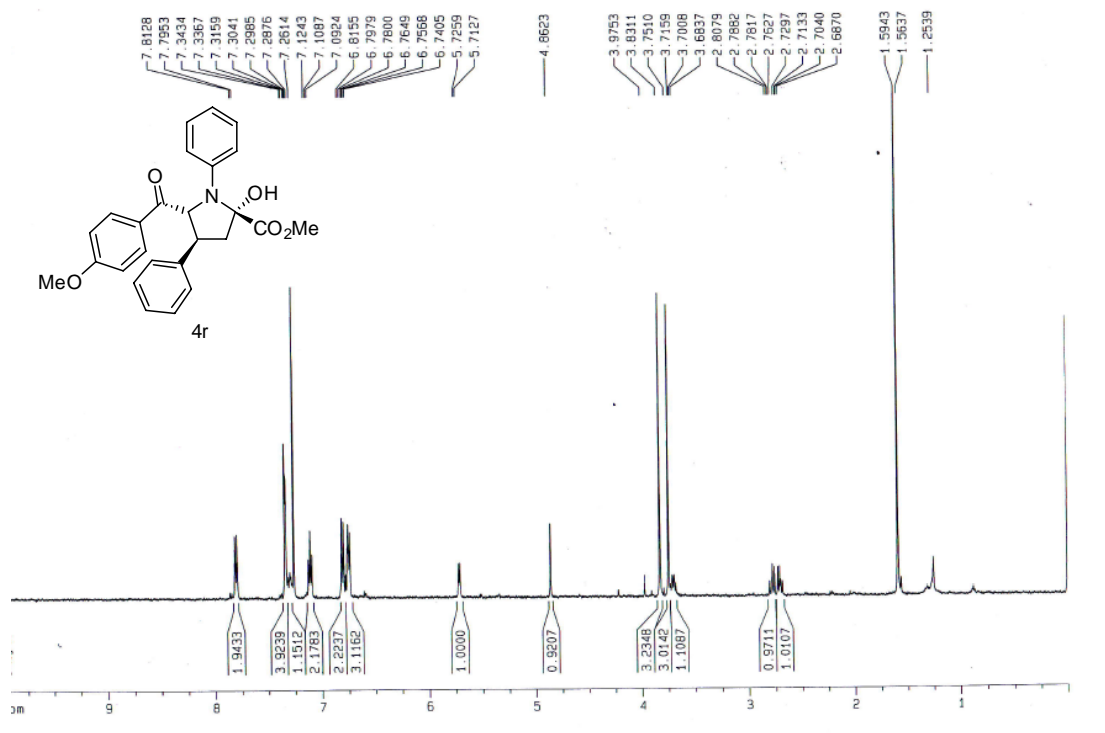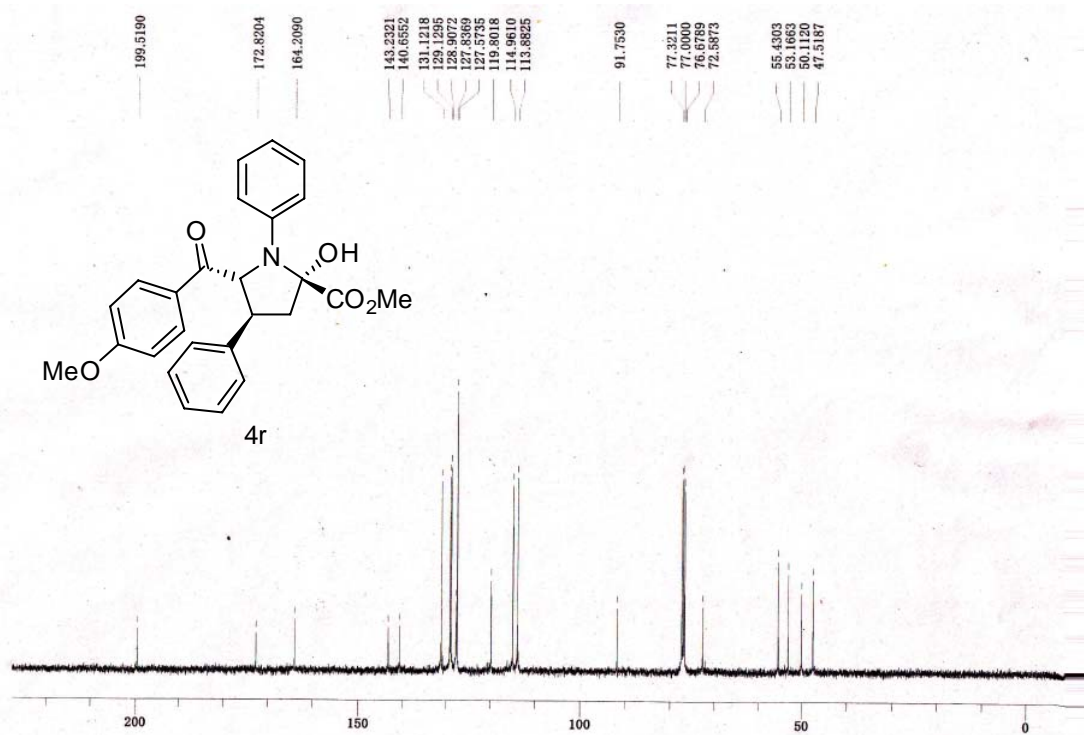

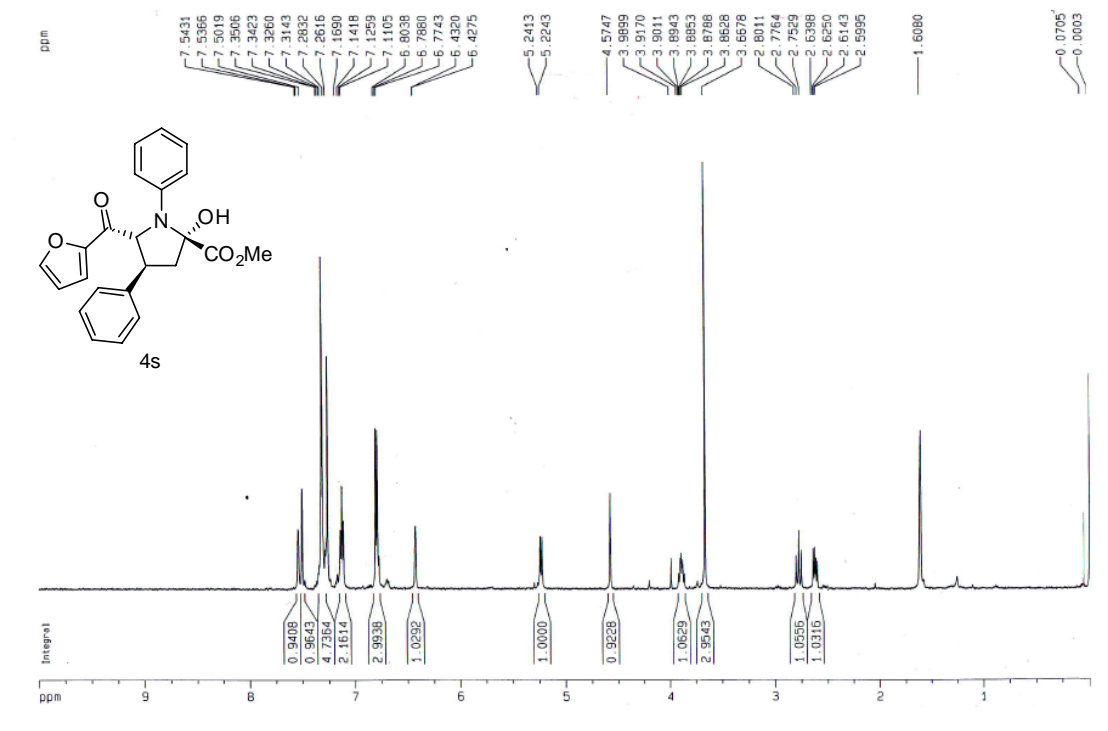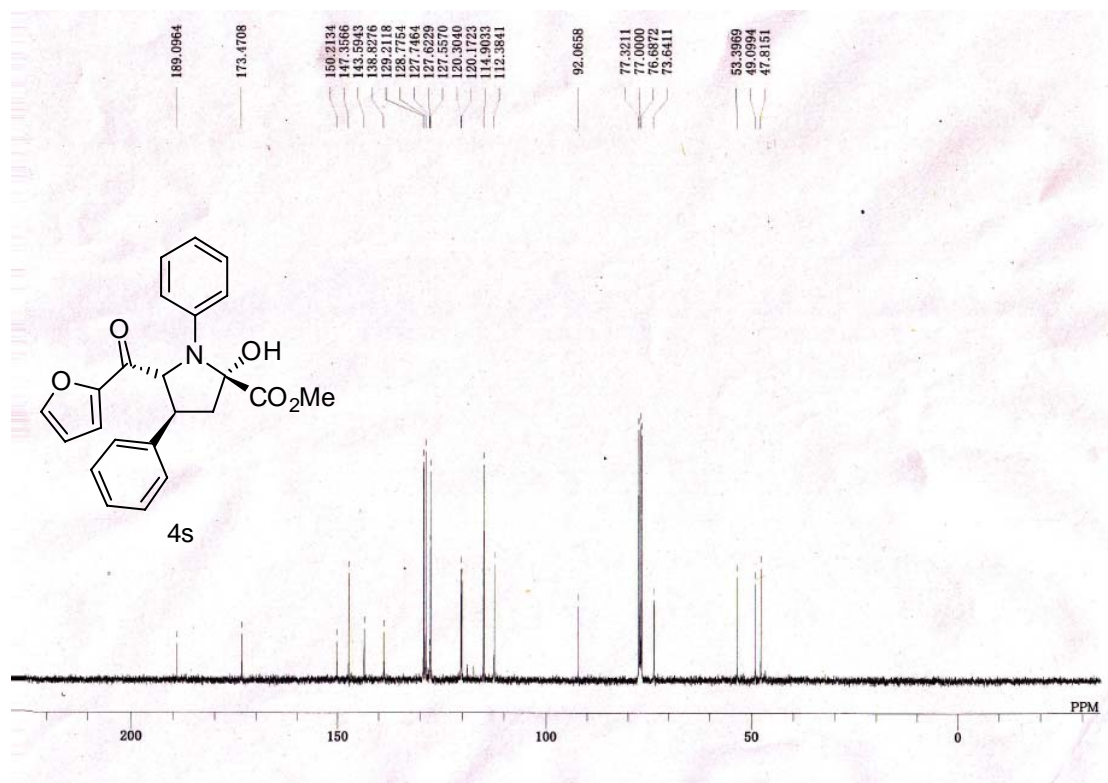

## References:

- (1) M. P. Doyle, M. A. McKervey, T. Ye, in *Modern Catalytic Methods for Organic Synthesis with Diazo Compounds*, John Wiley & Sons, New York, **1998**, pp. 1-46.
- (2) Wu, Y.; Liu, L.; Li, H.; Wang, D.; Chen, Y. *J. Org. Chem.* **2006**, *71*, 6592.
- (3) Vijayanthi, T.; Chadha, A. *Tetrahedron: Asymmetry* **2007**, *18*, 1077.
